# Supplementary material for: The Exploration of Joint Toxicity and Associated Mechanisms of Primary Microplastics and Methamphetamine in Zebrafish Larvae
Source: MDPI journal article supplement (doi:10.3390/toxics12010064), 2024-01-12
Supplement: s1 [file s1]

**Table S1.** Primer sequences for the genes tested in the present study

| Genes<br>name   | Primer name | Primer sequence (5'-3') | Genbank No.    |
|-----------------|-------------|-------------------------|----------------|
| <i>srfa</i>     | Forward     | CATACAGTGTCCACAGACGCA   | NM_001110526.1 |
|                 | Reverse     | CTGGGATGAACCTGGATGGC    |                |
| <i>elk1</i>     | Forward     | CTCTGGCGTCTCGTCAAGTT    | XM_691202.7    |
|                 | Reverse     | TGTAAACAACCCATCCGGGG    |                |
| <i>elk4</i>     | Forward     | GCTCAATCACCTCTGGCTGA    | NM_001308956.1 |
|                 | Reverse     | CATCAGAAAGTGTCTGTACCTGC |                |
| <i>jun</i>      | Forward     | CATGAACCACGTCAACAGCG    | NM_199987.1    |
|                 | Reverse     | CGAGTGAAGTTTTGCGCTCC    |                |
| <i>mapk9</i>    | Forward     | CCATGCAAAGAGGGCCTACA    | XM_001919653.6 |
|                 | Reverse     | CCTGGAACCTCCTCCAACGAC   |                |
| <i>nfatc2a</i>  | Forward     | AAGCCCTGAGTCTCCGACA     | XM_021470032.1 |
|                 | Reverse     | GGAGTATCAAGAGCGGCTTCC   |                |
| <i>nfatc4</i>   | Forward     | AGTCAGGAAAGCATCCAGGC    | XM_685091.8    |
|                 | Reverse     | CCGAAGCTCAATGTCGGAGT    |                |
| <i>cyp3c1</i>   | Forward     | GAGCGGTGGTGAGCATTAGT    | NM_212673.1    |
|                 | Reverse     | TGGCAAAGGTCTTGGTCCTG    |                |
| <i>cyp3c4</i>   | Forward     | ACGGTGGTGATCAATGGCTT    | NM_001077548.1 |
|                 | Reverse     | GGCCCGAGTCCAAAAGGTAT    |                |
| <i>cyp19a1a</i> | Forward     | GACTGGCTGCACAAAAAGCA    | NM_131154.3    |
|                 | Reverse     | CAAGTTTCTCTGCGTGTGCC    |                |

---

## **The detailed protocols of RNA extraction, sequencing and analysis**

A total amount of 1 µg RNA per sample was used as input material for the RNA sample preparations. Sequencing libraries were generated using NEBNext® Ultra™ RNA Library Prep Kit for Illumina® (NEB, USA) following manufacturer's recommendations and index codes were added to attribute sequences to each sample. The clustering of the index-coded samples was performed on a cBot Cluster Generation System using TruSeq PE Cluster Kit v3-cBot-HS (Illumina) according to the manufacturer's instructions. After cluster generation, the library preparations were sequenced on an Illumina Novaseq platform and 150 bp paired-end reads were generated. Paired-end clean reads were aligned to the reference genome using Hisat2 v2.0.5. The gene expression level was quantified by featureCounts v1.5.0-p3. Then, differential expression of Exposure and Control group was analyzed using the DESeq2 R package (1.16.1). The resulting P-values were adjusted using the Benjamini and Hochberg's approach for controlling the false discovery rate. Genes with an adjusted P-value <0.05 found by DESeq2 were assigned as differentially expressed.

---

## The detailed protocols of quantitative real-time PCR analysis

### 1. Prepare the following mixture in the qPCR tube

|                                          |            |
|------------------------------------------|------------|
| 2 × miRNA Universal SYBR qPCR Master Mix | 10.0 µl    |
| Specific Primer (10 µM)                  | 0.4 µl     |
| mQ Primer R (10 µM)*                     | 0.4 µl     |
| Template DNA/cDNA                        | x µl       |
| ddH <sub>2</sub> O                       | To 20.0 µl |

### 2. Perform qPCR reaction according to the following conditions

|         |                   |          |      |        |
|---------|-------------------|----------|------|--------|
| Stage 1 | Pre-denaturation  | Reps: 1  | 95°C | 5 min  |
| Stage 2 | Circular reaction | Reps: 40 | 95°C | 10 sec |
|         |                   |          | 60°C | 30 sec |
| Stage 3 | Melting curve     | Reps: 1  |      | 15 sec |
|         |                   |          |      | 60 sec |
|         |                   |          |      | 15 sec |

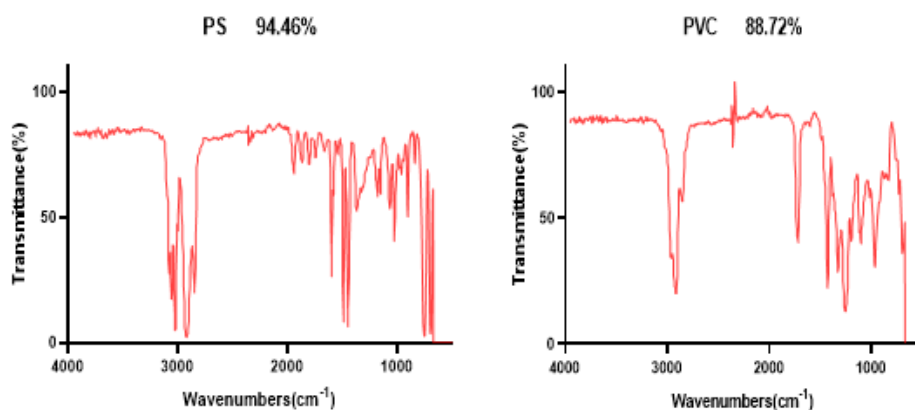

**Figure S1.** Purity of PS and PVC microplastics identified by Fourier transform infrared spectroscopy.

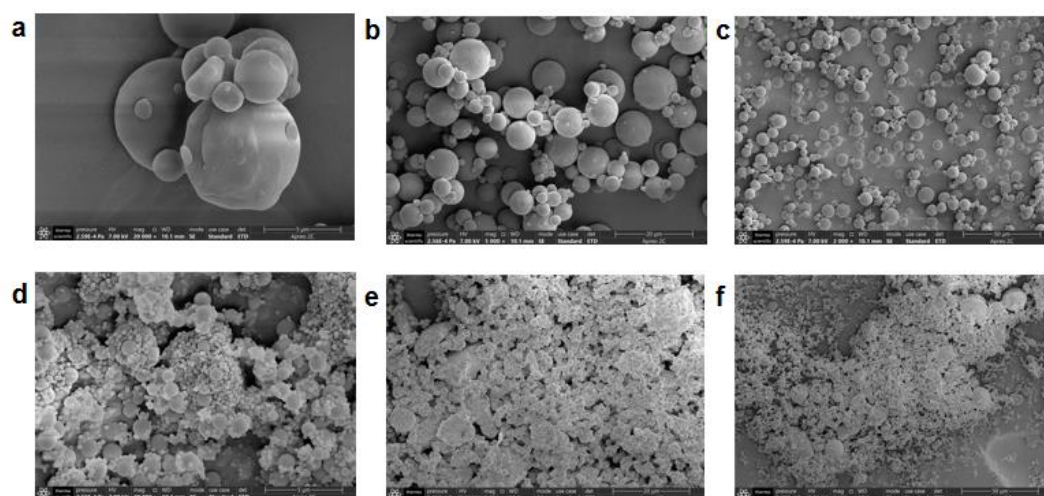

|     | Weighted Mean D[4,3] |
|-----|----------------------|
| PS  | 6.975 $\mu\text{m}$  |
| PVC | 3.760 $\mu\text{m}$  |

**Figure S2.** Electron microscope scans and particle size of PS and PVC microplastics, Monomer of PS (a-c) and PVC (d-f) MPs showed as smooth and intact sphere.

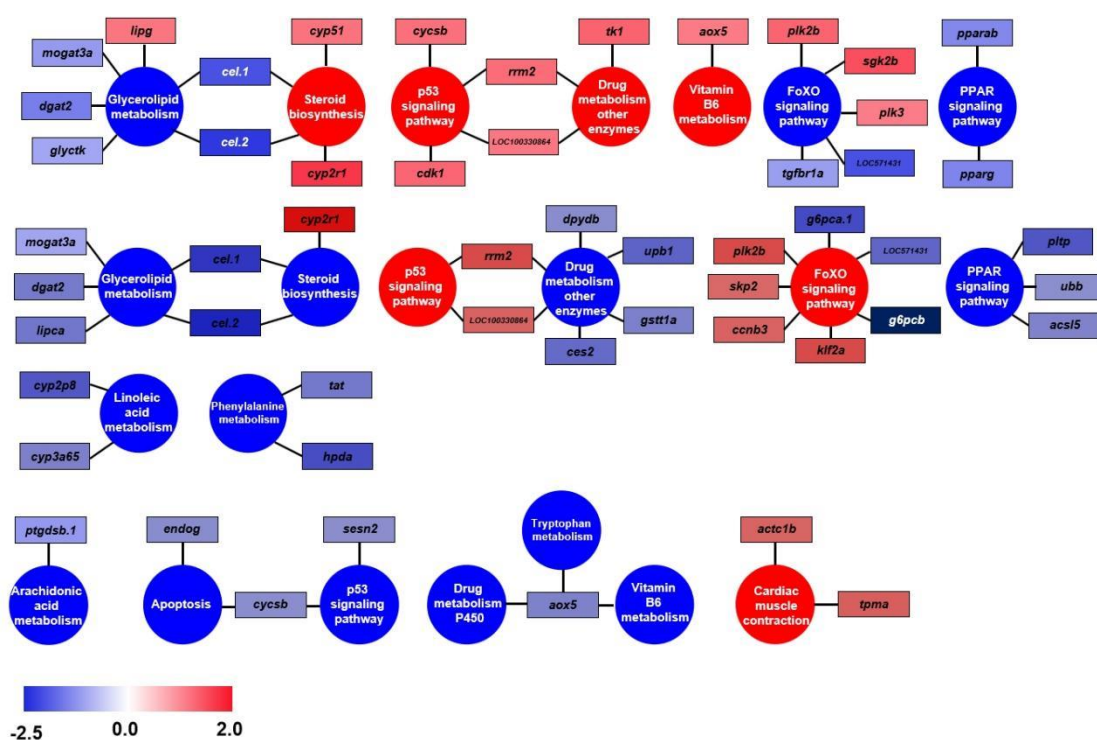

**Figure S3.** The correlation networks of PS or PS and METH based on the DEGs and the enrichment pathways.

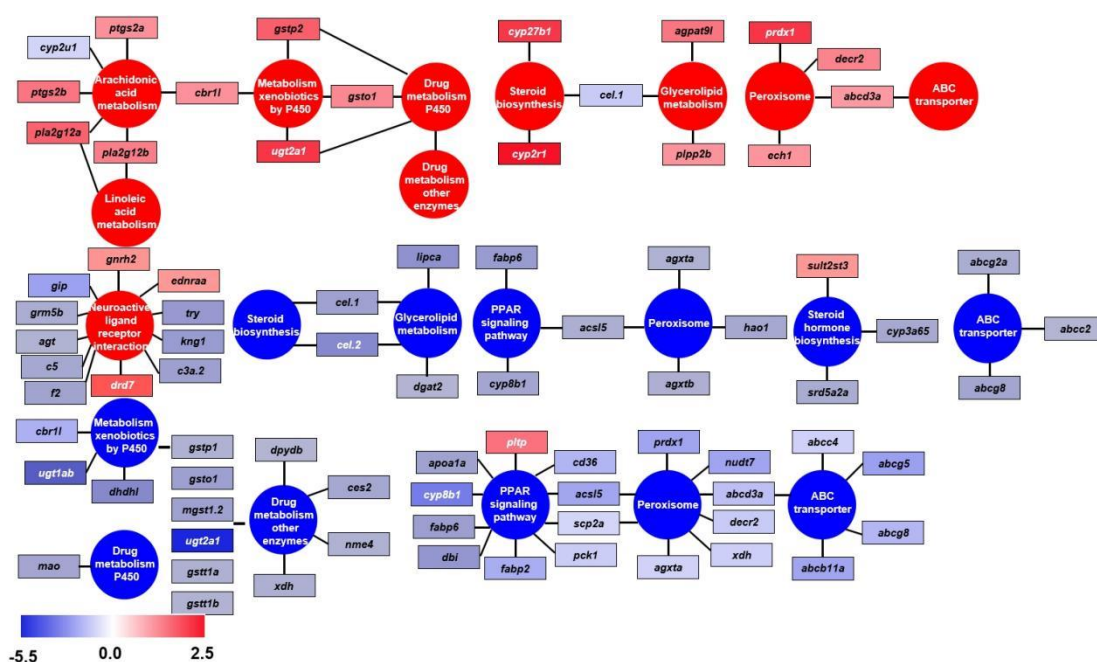

**Figure S4.** The correlation networks of PVC or PVC and METH based on the DEGs and the enrichment pathways.
